# Supplementary material for: Microbiota diversity and gene expression dynamics in human oral biofilms
Source: PubMed Central journal article supplement (PMC4234424; doi:10.1186/1471-2164-15-311), 2014-04-27
Supplement: 1471-2164-15-311-S1.pdf [file 1471-2164-15-311-S1.pdf]

Relative Frequency (%)

100  
80  
60  
40  
20  
0

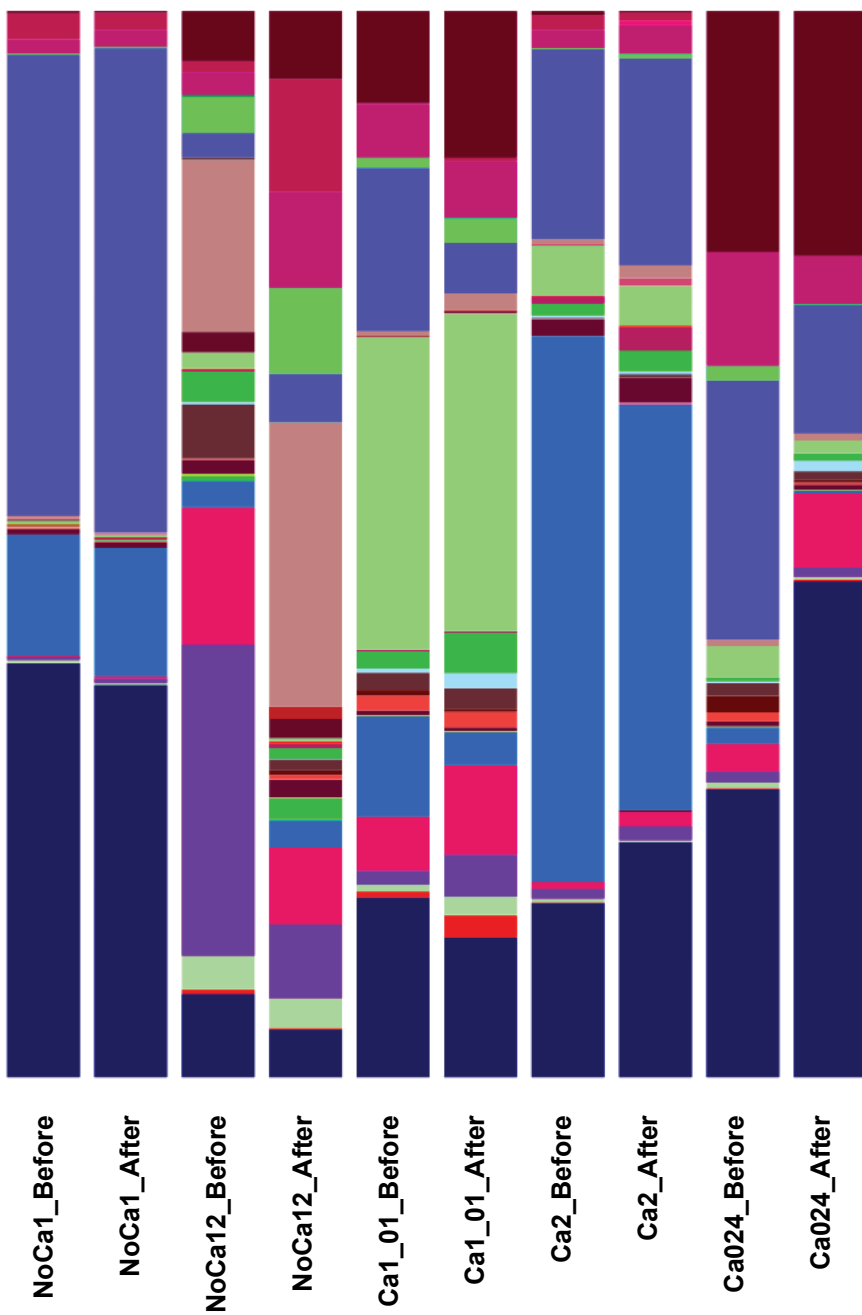

- Veillonella
- Treponema
- Tannerella
- Streptomyces
- Streptococcus
- Staphylococcus
- Solobacterium
- Selenomonas
- Rothia
- Riemerella
- Rhodococcus
- Propionibacterium
- Prevotella
- Porphyromonas
- Parvimonas
- Paludibacter
- Oribacterium
- Olsenella
- Neisseria
- Mycoplasma
- Megasphaera
- Leptotrichia
- Leptothrix
- Lautropia
- Kribbella
- Kingella
- IncertaeSedis
- Haemophilus
- Granulicatella
- Gemella
- Fusobacterium
- Eubacterium
- Escherichia-Shigella
- Eikenella
- Dialister
- Desulfomicrobium
- Desulfobulbus
- Corynebacterium
- Comamonas
- Chryseobacterium
- Cardiobacterium
- Capnocytophaga
- CandidatusAccumulibacter
