# Supplementary material for: Microbiota diversity and gene expression dynamics in human oral biofilms
Source: PubMed Central journal article supplement (PMC4234424; doi:10.1186/1471-2164-15-311), 2014-04-27

Log<sub>2</sub> Ratio

6  
4  
2  
0  
-2  
-4  
-6  
6  
4  
2  
0  
-2  
-4  
-6  
6  
4  
2  
0  
-2  
-4  
-6  
6  
4  
2  
0  
-2  
-4  
-6  
6  
4  
2  
0  
-2  
-4  
-6

Ca024

Ca2

Ca1\_01

NoCa12

NoCa1

Abiotrophia  
Actinobacillus  
Actinomyces  
Aggregatibacter  
Campylobacter  
Capnocytophaga  
Cardiobacterium  
Corynebacterium  
Dialister  
Eubacterium  
Fusobacterium  
Gemella  
Granulicatella  
Haemophilus  
Kingella  
Leptotrichia  
Neisseria  
Oribacterium  
Porphyromonas  
Prevotella  
Rothia  
Selenomonas  
Streptococcus  
Tannerella  
Tessaracoccus  
TM7\_genera  
Treponema  
Veillonella

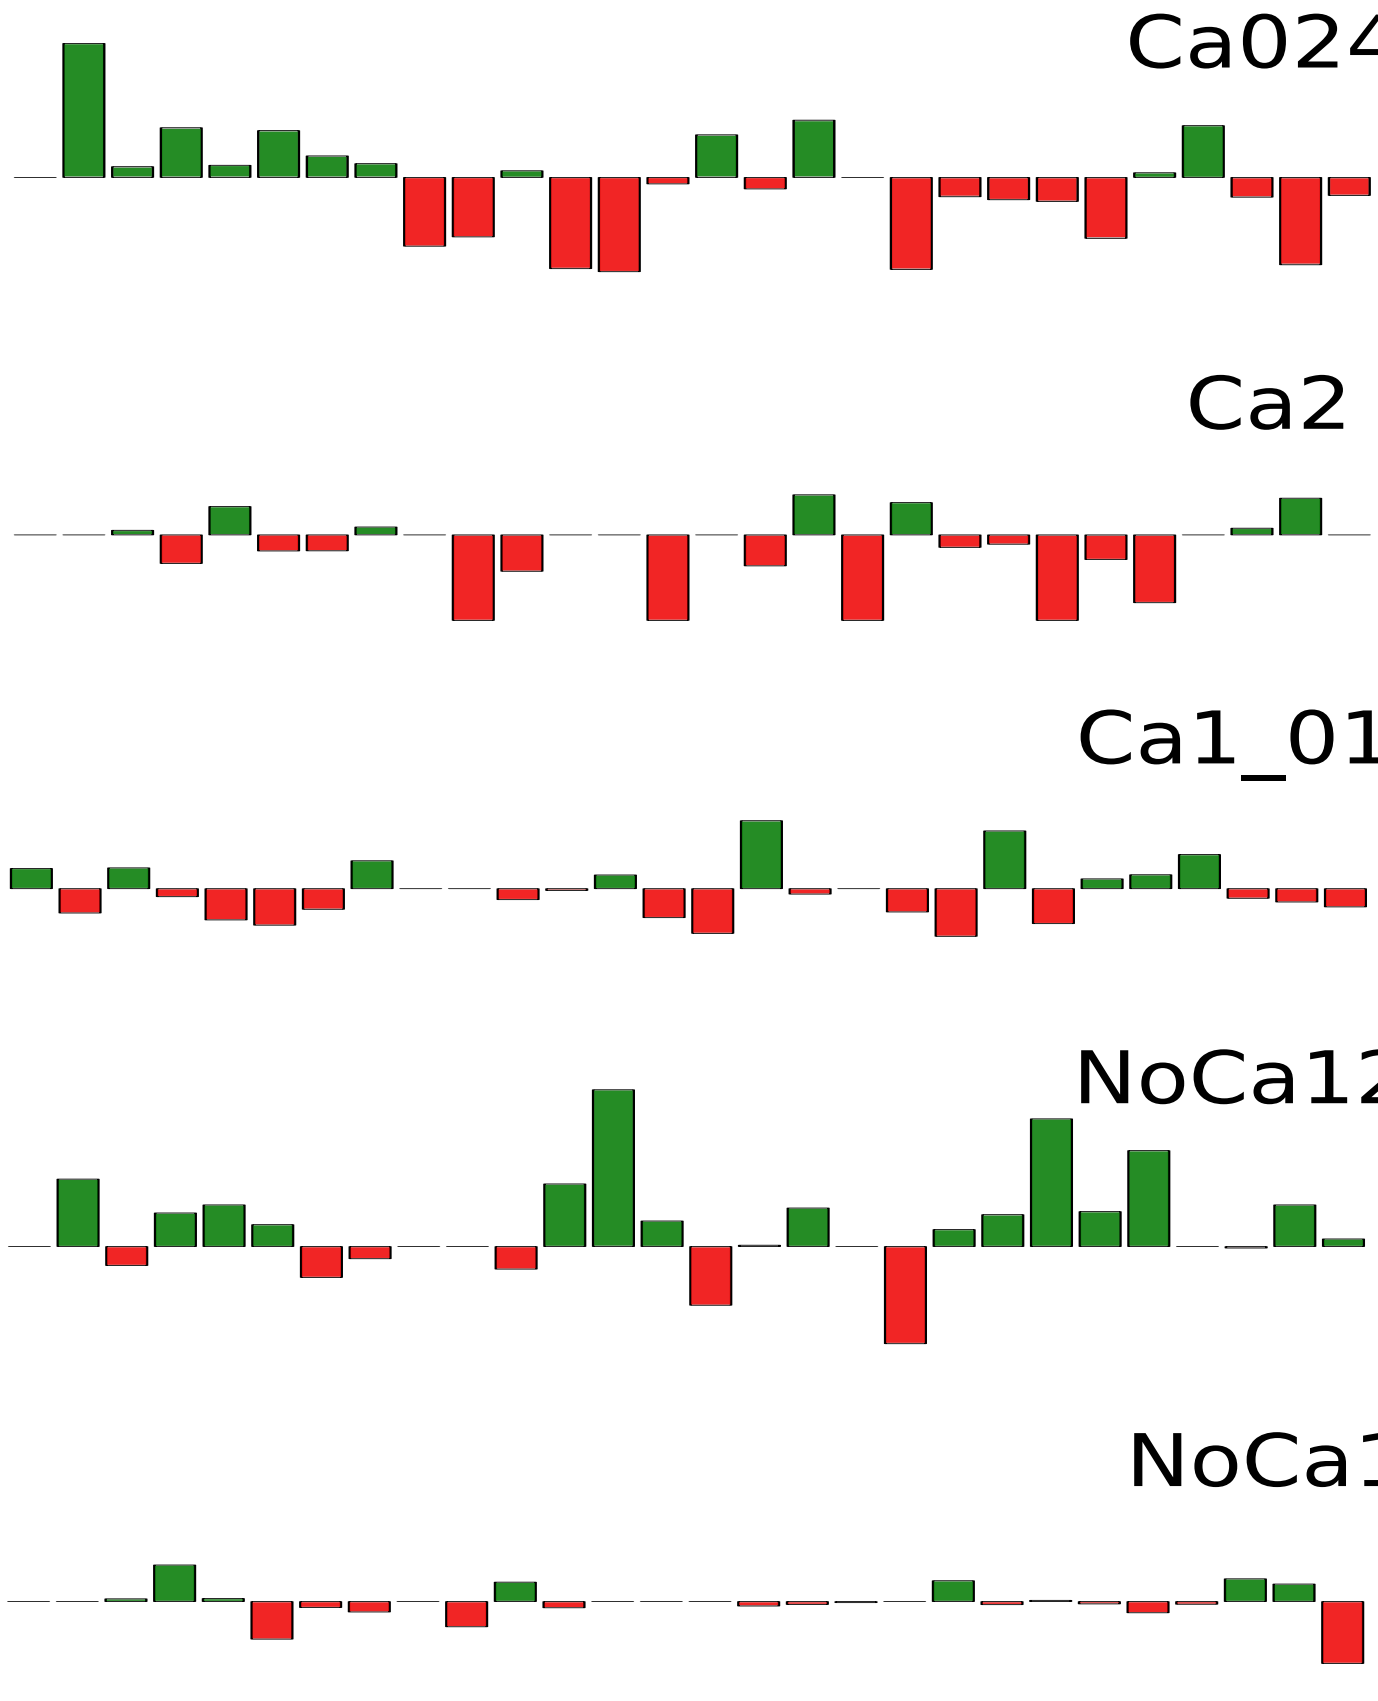

Supplement: 1471-2164-15-311-S3.pdf [file 1471-2164-15-311-S3.pdf]
