# Supplementary material for: Microbiota diversity and gene expression dynamics in human oral biofilms
Source: PubMed Central journal article supplement (PMC4234424; doi:10.1186/1471-2164-15-311), 2014-04-27

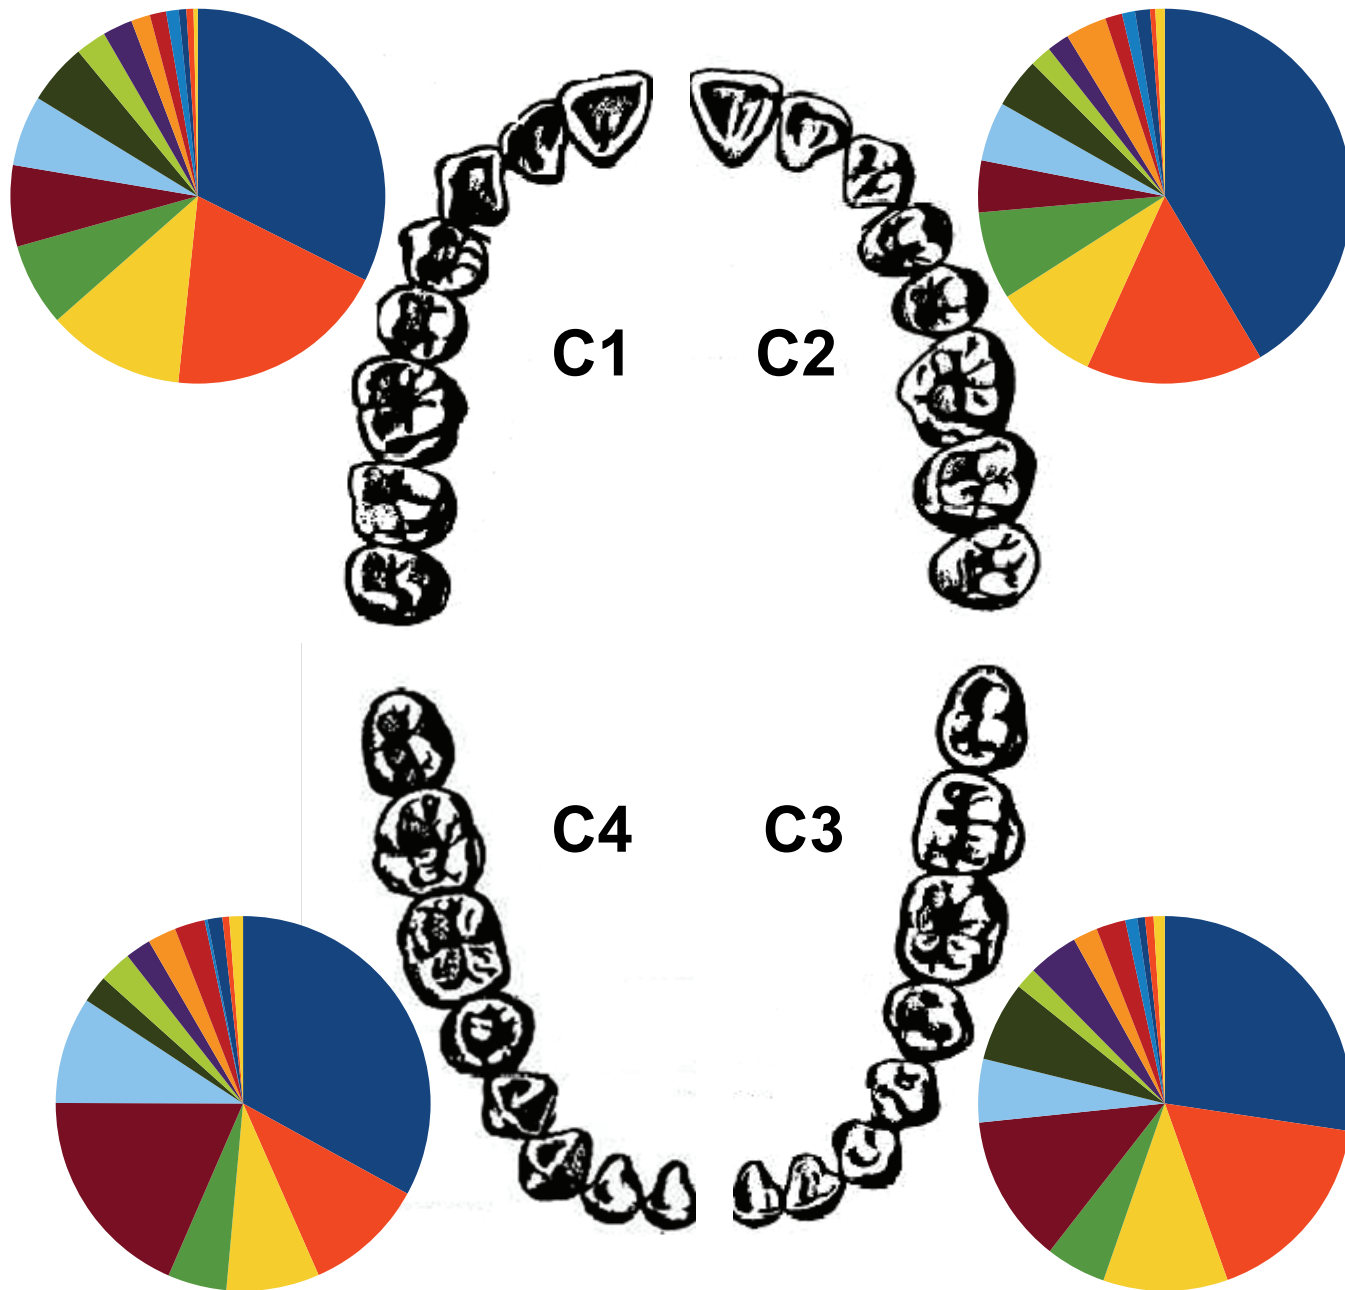

- Actinobacteria
- unclassified\_Burkholderiales
- Comamonadaceae
- Campylobacteraceae
- Neisseriaceae
- Veillonellaceae
- Pasteurellaceae
- Flavobacteria
- Cardiobacteriaceae
- Streptococcaceae
- Fusobacteriaceae
- TM7
- Prevotellaceae
- Porphyromonadaceae
- Leptotrichiaceae

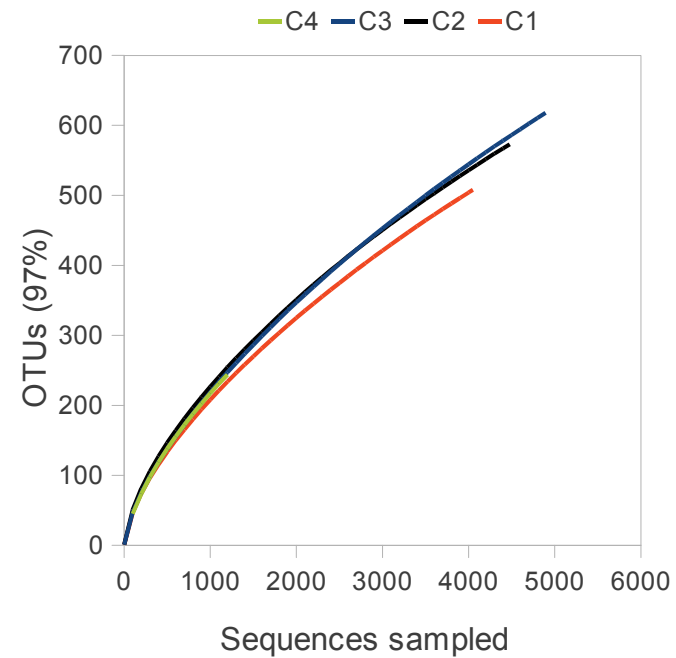

Supplement: 1471-2164-15-311-S5.pdf [file 1471-2164-15-311-S5.pdf]
